## CORRECTION

# Correction: A Progress-driven approach to cognitive outcomes after traumatic brain injury: A study protocol for advancing equity, diversity, and inclusion through knowledge synthesis and mobilization

The PLOS One staff

The first author initials appear incorrectly in the citation. The correct citation is: Tylinski Sant'Ana T, Hanafy S, Fuller-Thomson E, McDonald M, Colantonio A, Cee D, et al. (2024) A Progress-driven approach to cognitive outcomes after traumatic brain injury: A study protocol for advancing equity, diversity, and inclusion through knowledge synthesis and mobilization. PLoS ONE 19(7): e0307418. <https://doi.org/10.1371/journal.pone.0307418>.

The publisher apologizes for the error.

## Reference

1. Sant'Ana TT, Hanafy S, Fuller-Thomson E, McDonald M, Colantonio A, Cee D, et al. A Progress-driven approach to cognitive outcomes after traumatic brain injury: A study protocol for advancing equity, diversity, and inclusion through knowledge synthesis and mobilization. PLoS One. 2024;19(7):e0307418. <https://doi.org/10.1371/journal.pone.0307418> PMID: [39037993](https://pubmed.ncbi.nlm.nih.gov/39037993/)

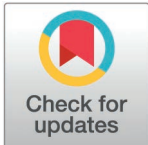

## OPEN ACCESS

**Citation:** The PLOS One staff (2025)

Correction: A Progress-driven approach to cognitive outcomes after traumatic brain injury: A study protocol for advancing equity, diversity, and inclusion through knowledge synthesis and mobilization. PLoS ONE 20(3): e0319818. <https://doi.org/10.1371/journal.pone.0319818>

**Published:** March 5, 2025

**Copyright:** © 2025 The PLOS One staff. This is an open access article distributed under the terms of the [Creative Commons Attribution License](https://creativecommons.org/licenses/by/4.0/), which permits unrestricted use, distribution, and reproduction in any medium, provided the original author and source are credited.

**Funding:** None declared
